# Supplementary material
Source: PubMed Central journal article supplement (PMC2717892)
Supplement: NIHMS128193-supplement-1_si_001.pdf [file NIHMS128193-supplement-1_si_001.pdf]

Supplementary Material for:

**PARACEST Properties of a Dinuclear Neodymium (III) Complex Bound to DNA or Carbonate**

Kido Nwe, Christopher M. Andolina, Ching-Hui Huang and Janet R. Morrow\*

Department of Chemistry, University at Buffalo, State University of New York, Buffalo,

NY 14260

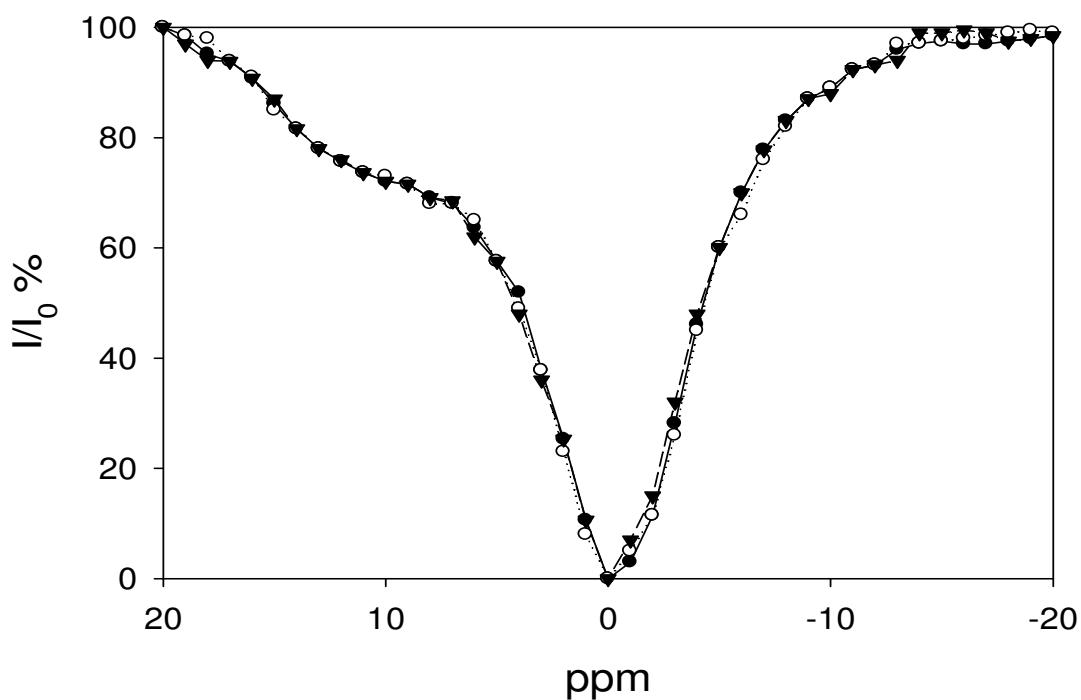

**Figure S1.** CEST spectra of Nd<sub>2</sub>(**1**) (5.0 mM complex, 10 mM HEPES, 50 mM NaNO<sub>3</sub>) as a function of irradiation time (●) 3s (○), (Δ) 5s and (▼) 7s.  $B_1 = 1,000$  Hz,  $T = 25^\circ\text{C}$

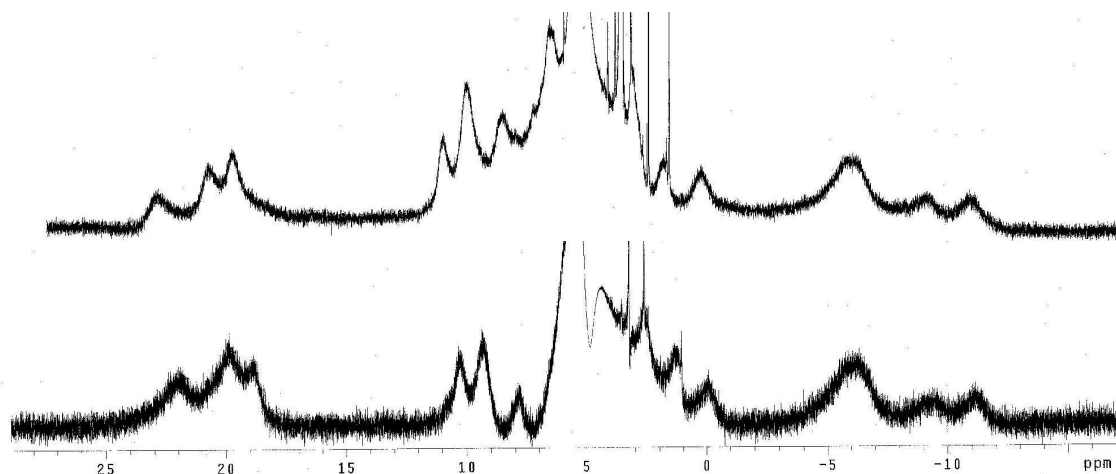

**Figure S2.**  $^1\text{H}$  NMR spectra of 5 mM  $\text{Nd}_2(\mathbf{1})$  in  $\text{H}_2\text{O}$  (top) and  $\text{D}_2\text{O}$  (bottom) pH 7.4 (pD 7.0), 10 mM HEPES and 25°C. Note the lack of a proton resonance corresponding to the CEST peak for the amide protons at 16-17 ppm.

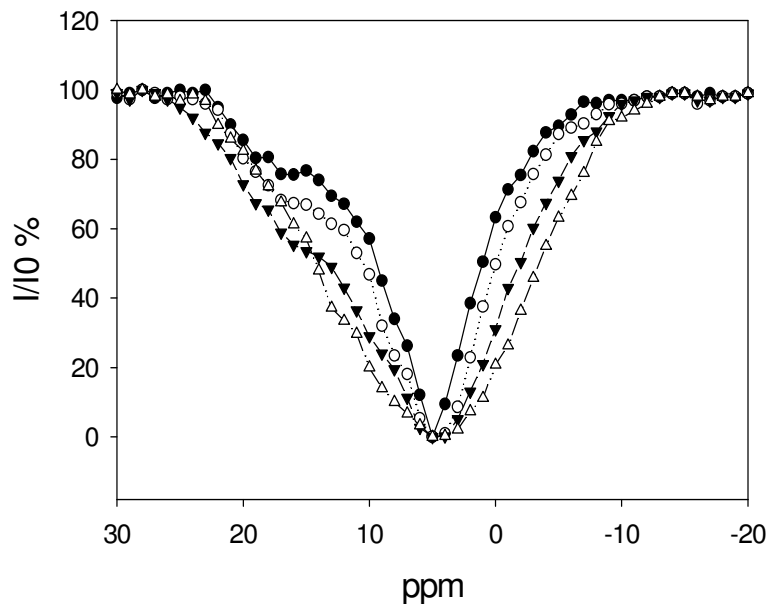

**Figure S3.** Top: CEST spectra of  $\text{Nd}_2(\mathbf{11})$  (5.0 mM complex, 10 mM hepes, 50 mM  $\text{NaNO}_3$ ) at pH 6.5 ( $\bullet$ ), 7.0 ( $\circ$ ), 7.5 ( $\blacktriangledown$ ) and 8.0 ( $\triangle$ ).  $B_1 = 1,500$  Hz,  $T = 25^\circ\text{C}$ . shift water to zero

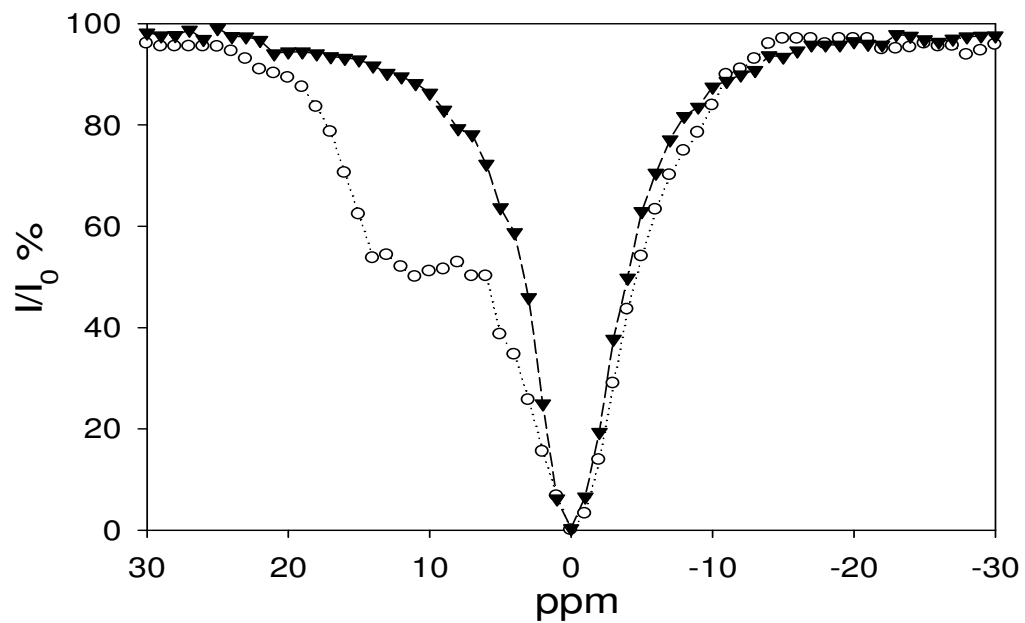

**Figure S4.** CEST spectra of 10 mM  $\text{Nd}_2(\mathbf{1})$  ( $\circ$ ), and 10 mM of  $\text{Eu}_2(\mathbf{1})$  ( $\blacktriangle$ ) at pH 7.0, 10 mM Hepes buffer, 50 mM  $\text{NaNO}_3$ , 25 °C,  $B_1 = 1,500$  Hz.

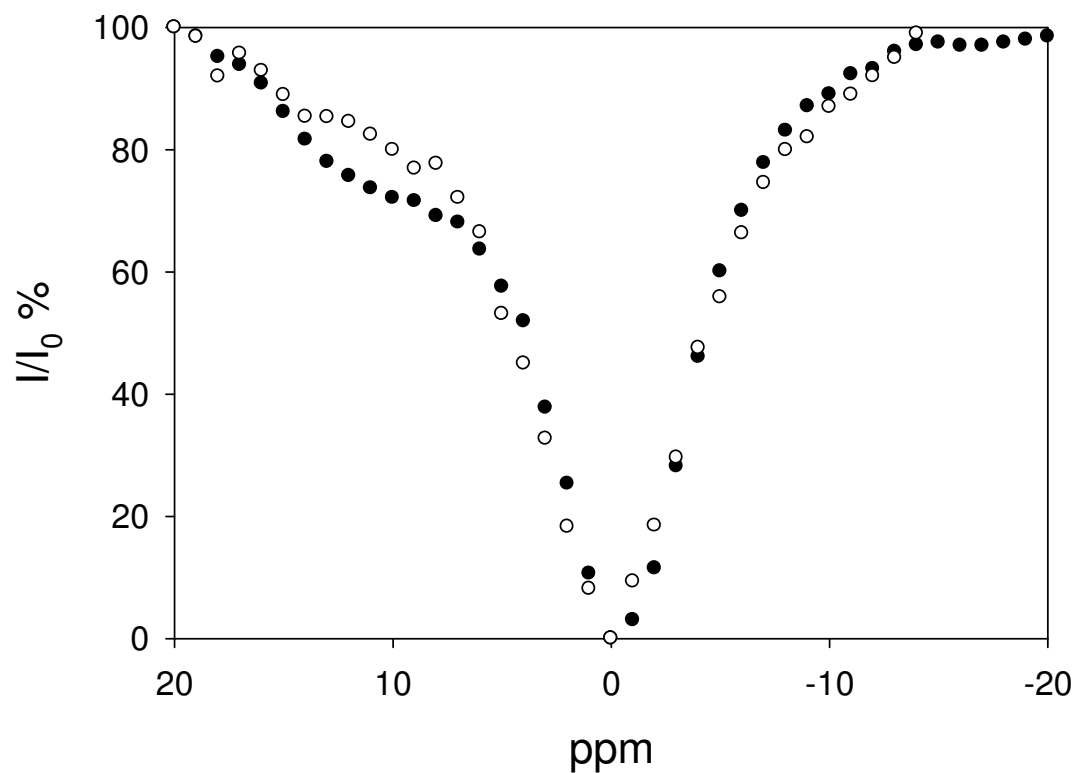

**Figure S5.** CEST spectra of Nd<sub>2</sub>(1) 5.0 mM (●) titrated with 0 mM DEP (●), 5.0 mM DEP (○) at pH 7.0, 10 mM HEPES, 50 mM NaNO<sub>3</sub>, 25 °C.

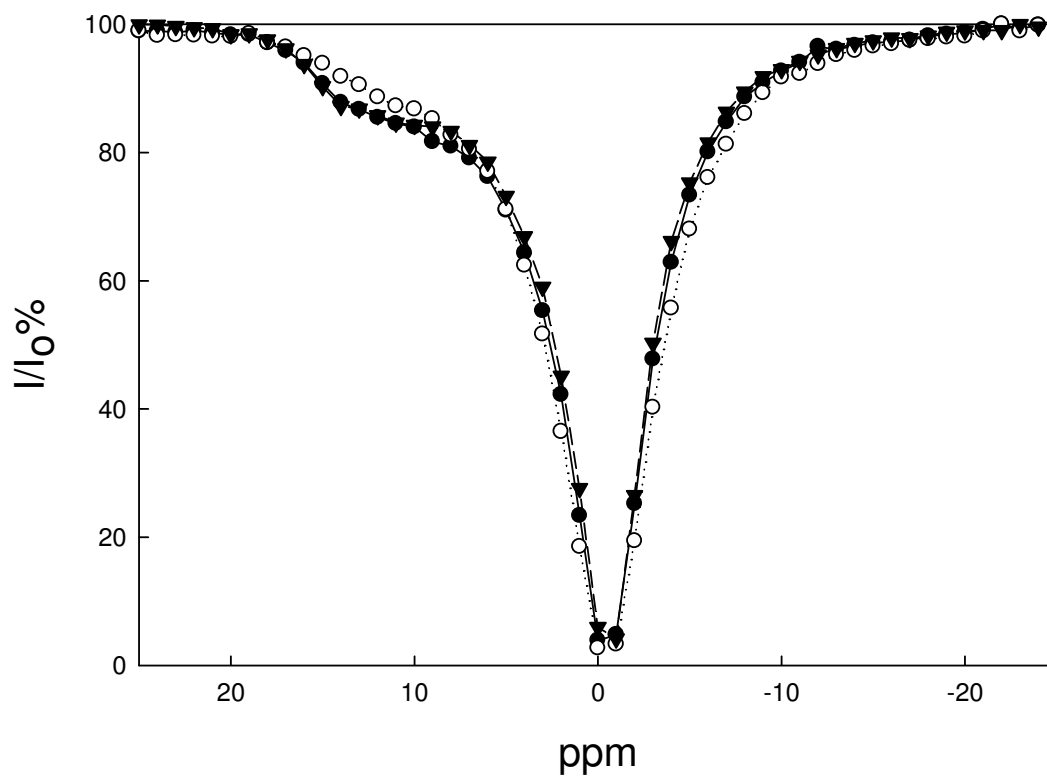

**Figure S6.** The CEST effect of  $Nd_2(1)$  is decreased upon addition of carbonate. CEST spectra of  $Nd_2(1)$  (5.0 mM complex, 10 mM HEPES, 50 mM  $NaNO_3$ ) (●), addition of 5mM  $NaHCO_3$  (○), carbonate removed by treatment with  $Pb(NO_3)_2$  (▼),  $T = 25^\circ C$ .

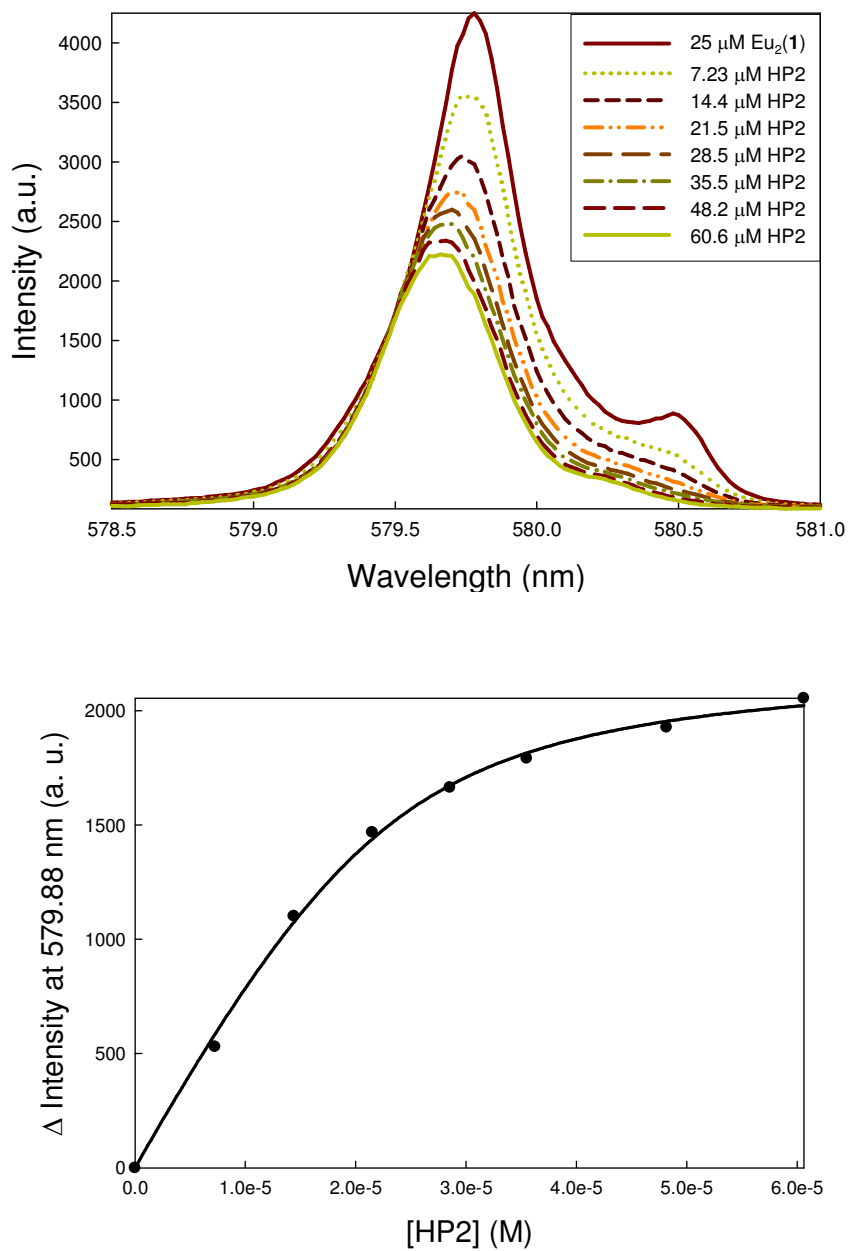

**Figure S7.**  ${}^7\text{F}_0 \rightarrow {}^5\text{D}_0$  excitation spectra ( ${}^5\text{D}_0 \rightarrow {}^7\text{F}_2$  emission) of solutions of 25  $\mu\text{M}$   $\text{Eu}_2(\mathbf{1})$  (●) titrated with **HP2** DNA at pH = 7.0, 20 mM HEPES, 50 mM  $\text{NaNO}_3$ . Binding isotherm is fit to eq. 3 with a  $K_d$  of 4.2  $\mu\text{M}$  ( $n=12$ ).

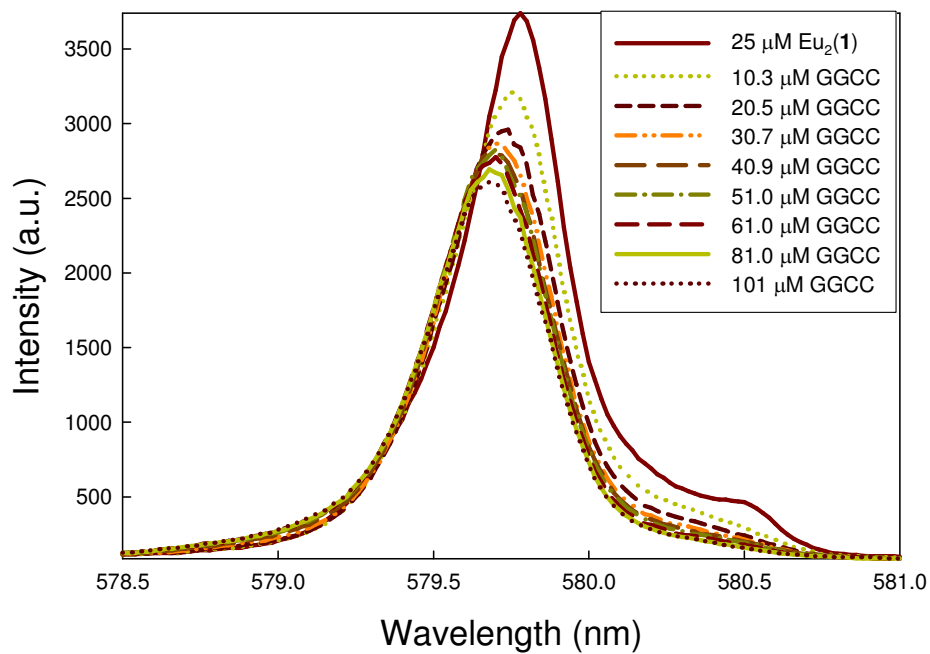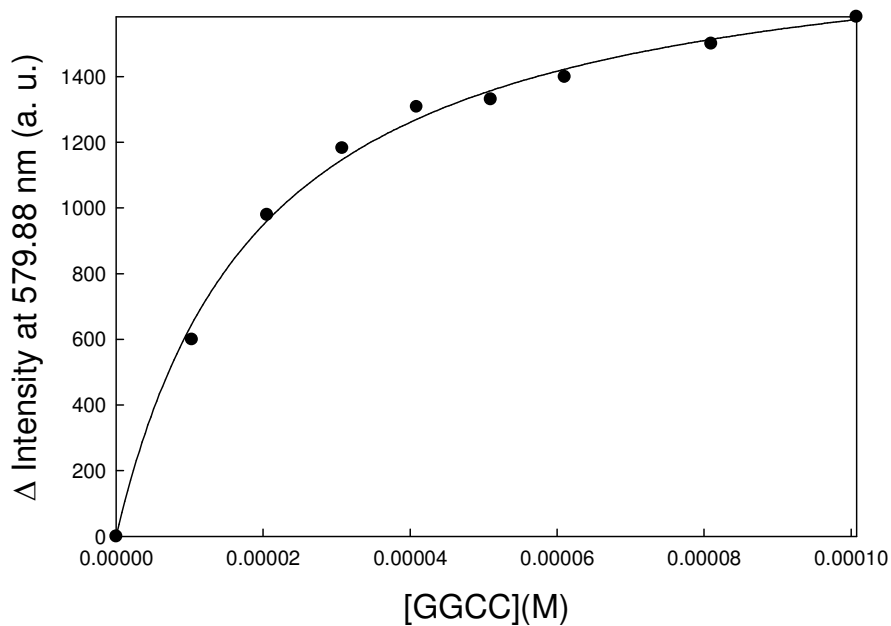

**Figure S8.**  ${}^7F_0 \rightarrow {}^5D_0$  excitation spectra ( ${}^5D_0 \rightarrow {}^7F_2$  emission) of solutions of 25  $\mu\text{M}$   $\text{Eu}_2(\mathbf{1})$  (●) titrated with double stranded **GGCCGGCC** DNA at pH = 7.0, 20 mM HEPES, 50 mM  $\text{NaNO}_3$ . Binding isotherm is fit to eq. 3 with  $K_d$  of 28  $\mu\text{M}$  ( $n=6.9$ ).

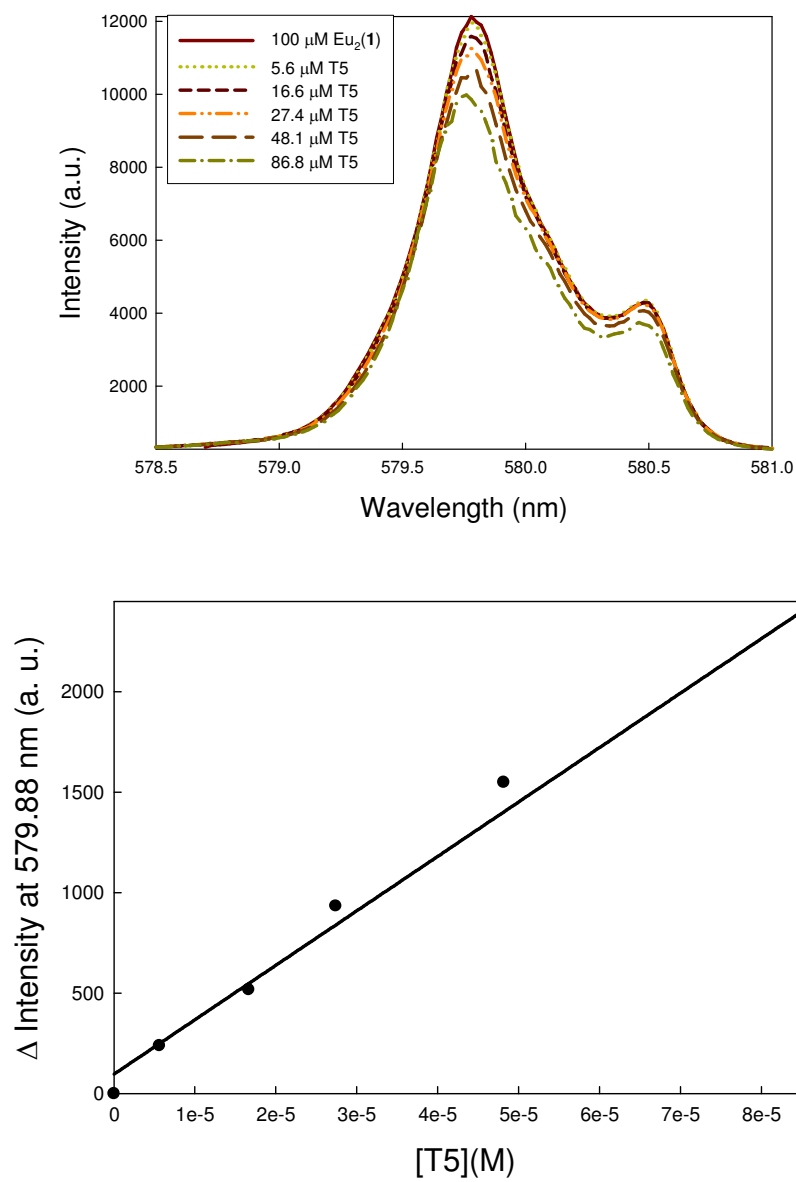

**Figure S9.**  ${}^7F_0 \rightarrow {}^5D_0$  excitation spectra ( ${}^5D_0 \rightarrow {}^7F_2$  emission) of solutions of 100  $\mu\text{M}$   $\text{Eu}_2(\mathbf{1})$  titrated with **HP1** DNA at pH = 7.0, 20 mM HEPES, 50 mM  $\text{NaNO}_3$ . Binding isotherm is fit a linear equation.



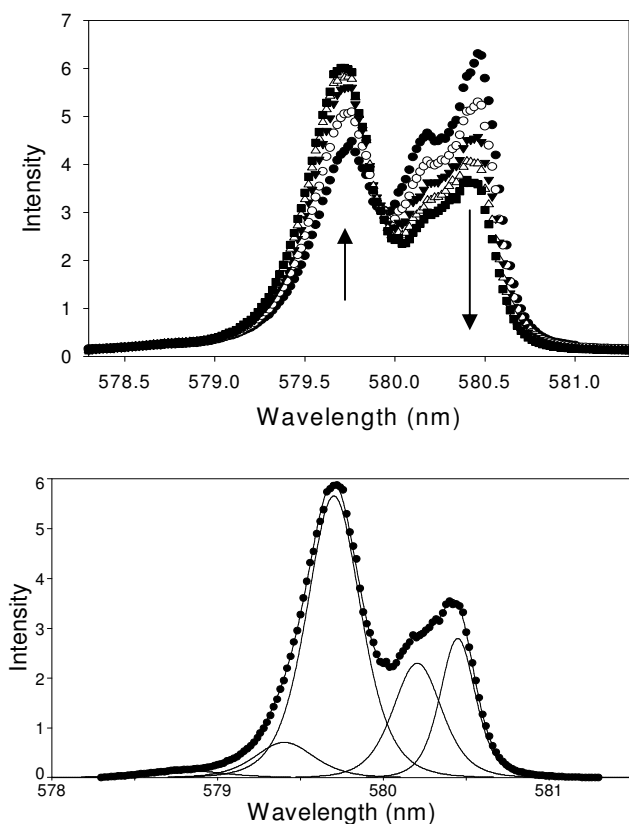

**Figure S10.**  ${}^7F_0 \rightarrow {}^5D_0$  excitation spectra ( ${}^5D_0 \rightarrow {}^7F_2$  emission) of solutions of 20  $\mu\text{M}$   $\text{Eu}_2(\mathbf{1})$  carbonate complex ( $\bullet$ ) titrated with 2  $\mu\text{M}$  ( $\circ$ ), 4  $\mu\text{M}$  ( $\blacktriangledown$ ), 6  $\mu\text{M}$  ( $\Delta$ ) and 8  $\mu\text{M}$  ( $\blacksquare$ ) **HP1** DNA at pH = 7.0, 20 mM HEPES, 50 mM  $\text{NaNO}_3$ . b) Deconvoluted  ${}^7F_0 \rightarrow {}^5D_0$  excitation spectra of  $\text{Eu}_2(\mathbf{1})$  (20  $\mu\text{M}$ ) in the presence of 8  $\mu\text{M}$  of **HP1** DNA. Peaks centered at 580.20 and 580.45 nm are attributed to carbonate complex. The peak that grows in at 578.82 nm is the  $\text{Eu}_2(\mathbf{1})$  complex with **HP1**.
